# Supplementary material for: Esophageal cancer due to dietary risk factors Deaths Trends Globally, Regionally, and Nationally, 1990-2021: An Age-Period-Cohort Analysis
Source: Research Square preprint supplement (doi:10.21203/rs.3.rs-4935239/v1), 2024-10-16
Supplement: Supplementary file 1 [file 138160b0a97ddaaaa859112e.xlsx]

## Sheet: Sheet1
Table 1: Trends in Esophageal cancer due to Dietary risks across SDI quintiles, 1990-2021
	Global (N = 204)		High SDI (N = 41)		High-middle SDI (N = 41)		Middle SDI (N = 40)		Low-middle SDI (N = 41)		Low SDI (N = 41)
	1990	2021	1990	2021	1990	2021	1990	2021	1990	2021	1990	2021
Population
Number, n	5333623425.64 (5231035879.11, 5444650282.47)	7891353300.74 (7666733980.42, 8131224517.81)	879533669.96 (857730319.33, 901199784.96)	1094047735.61 (1063559815.95, 1125004948.37)	1063532174.05 (1028133499.19, 1100541186.46)	1304031282.73 (1251357342.44, 1359983272.45)	1722906891.05 (1667961018.75, 1774137319.58)	2448543920.68 (2353584070.33, 2542109614.73)	1161410303.56 (1120137771.59, 1200684355.12)	1921112323.91 (1821413930.18, 2023272944.93)	501300581.51 (487907019.65, 514756128.18)	1117382590.51 (1068353861.44, 1166401098.73)
Percentage of global, %	100	100	16.5	13.9	19.9	16.5	32.3	31	21.8	24.3	9.4	14.2
Deaths cases
Number, n	74453.71 (-16380.28, 147090.67)	56939.09 (-12023.44, 118369.96)	10317.93 (-2227.81, 20751.76)	13662.25 (-2955.79, 27781.89)	22440.91 (-4883.28, 44988.5)	6709.38 (-1326.22, 15558.81)	31496.69 (-6765.43, 62095.61)	17127.34 (-3743.15, 37731.46)	6105.72 (-1447.44, 11904.99)	12134.55 (-2570.72, 24640.66)	4061.27 (-953.93, 7763.05)	7263.34 (-1473.63, 14126.7)
Percentage of global, %	100	100	13.9	24	30.1	11.8	42.3	30.1	8.2	21.3	5.5	12.8
Percent change of deaths 1990–2019, %	-0.24 (-0.34, -0.13)		0.32 (0.24, 0.39)		-0.7 (-0.78, -0.59)		-0.46 (-0.58, -0.31)		0.99 (0.77, 1.24)		0.79 (0.48, 1.11)
All-age deaths rate
Rate per 100,000	1.4 (-0.31, 2.76)	0.72 (-0.15, 1.5)	1.17 (-0.25, 2.36)	1.25 (-0.27, 2.54)	2.11 (-0.46, 4.23)	0.51 (-0.1, 1.19)	1.83 (-0.39, 3.6)	0.7 (-0.15, 1.54)	0.53 (-0.12, 1.03)	0.63 (-0.13, 1.28)	0.81 (-0.19, 1.55)	0.65 (-0.13, 1.26)
Percent change of rate 1990–2019, %	-0.48 (-0.55, -0.41)		0.06 (0, 0.12)		-0.76 (-0.82, -0.67)		-0.62 (-0.7, -0.51)		0.2 (0.07, 0.36)		-0.2 (-0.34, -0.05)
Age-standardized deaths rate
Rate per 100,000	1.89 (-0.42, 3.73)	0.66 (-0.14, 1.38)	0.94 (-0.2, 1.88)	0.64 (-0.14, 1.29)	2.26 (-0.49, 4.54)	0.34 (-0.07, 0.79)	3.11 (-0.66, 6.14)	0.66 (-0.14, 1.48)	1.02 (-0.24, 1.99)	0.86 (-0.18, 1.74)	1.84 (-0.44, 3.5)	1.48 (-0.3, 2.88)
Percent change of rate 1990–2019, %	-0.65 (-0.69, -0.6)		-0.32 (-0.36, -0.29)		-0.85 (-0.89, -0.8)		-0.79 (-0.83, -0.73)		-0.16 (-0.25, -0.05)		-0.19 (-0.33, -0.06)
APC model estimates
Net drift of deaths rate, % per year	-3.86 (-3.96, -3.75)		-1.51 (-1.7, -1.32)		-7.48 (-7.77, -7.18)		-5.93 (-6.09, -5.78)		-0.78 (-0.9, -0.65)		-0.99 (-1.15, -0.82)
Notes: Age-standardized deaths rate is computed by direct standardization with global standard population in GBD 2021. Net drifts are estimates derived from the age-period-cohort model and denotes overall annual percentage change in deaths, which captures the contribution of the effects from calendar time and successive birth cohorts. Parentheses for all GBD health estimate indicate 95% uncertain…
